# Supplementary material for: Antiprotozoal Activity of Thymoquinone (2-Isopropyl-5-methyl-1,4-benzoquinone) for the Treatment of Leishmania major-Induced Leishmaniasis: In Silico and In Vitro Studies
Source: MDPI journal article supplement (doi:10.3390/antibiotics11091206), 2022-09-06
Supplement: s1 [file s1]

## *Supplementary Material*

# **Antiprotozoal Activity of Thymoquinone (2-Isopropyl-5-methyl-1,4-benzoquinone) for the Treatment of *Leishmania major*-Induced Leishmaniasis: In Silico and In Vitro Studies**

**Kamal A. Qureshi<sup>1, \*</sup> Mahrukh Imtiaz<sup>2</sup>, Ibrahim Al Nasr<sup>3, 4</sup>, Waleed S. Koko<sup>3</sup>, Tariq A. Khan<sup>5</sup>, Mariusz Jaremko<sup>6</sup>, Syed Mahmood<sup>7</sup>, M. Qaiser Fatmi<sup>2, \*</sup>**

<sup>1</sup> Department of Pharmaceutics, Unaizah College of Pharmacy, Qassim University, Unaizah 51911, Saudi Arabia

<sup>2</sup> Department of Biosciences, COMSATS University Islamabad, Islamabad 45600, Pakistan; mahukhimtiaz92@yahoo.com (M.I.)

<sup>3</sup> Department of Laboratory Sciences, College of Science and Arts, Qassim University, Ar Rass 51921, Saudi Arabia; insar@qu.edu.sa (I.A.N.); wa.mohamed@qu.edu.sa (W.S.K.)

<sup>4</sup> Department of Biology, College of Science and Arts, Qassim University, Unaizah 51911, Saudi Arabia

<sup>5</sup> Department of Clinical Nutrition, College of Applied Health Sciences, Qassim University, Ar Rass 51921, Saudi Arabia; tara.khan@qu.edu.sa (T.A.K.)

<sup>6</sup> Smart-Health Initiative (SHI) and Red Sea Research Center (RSRC), Division of Biological and Environmental Sciences and Engineering (BESE), King Abdullah University of Science and Technology (KAUST), Thuwal 23955, Saudi Arabia; mariusz.jaremko@kaust.edu.sa (M.J.)

<sup>7</sup> Department of Pharmaceutical Technology, Faculty of Pharmacy, Universiti Malaya, Kuala Lumpur 50603, Malaysia; syedmahmood@um.edu.my (S.M.)

\* Correspondence: ka.qurishe@qu.edu.sa (K.A.Q.); qaiser.fatmi@comsats.edu.pk (M.Q.F.)

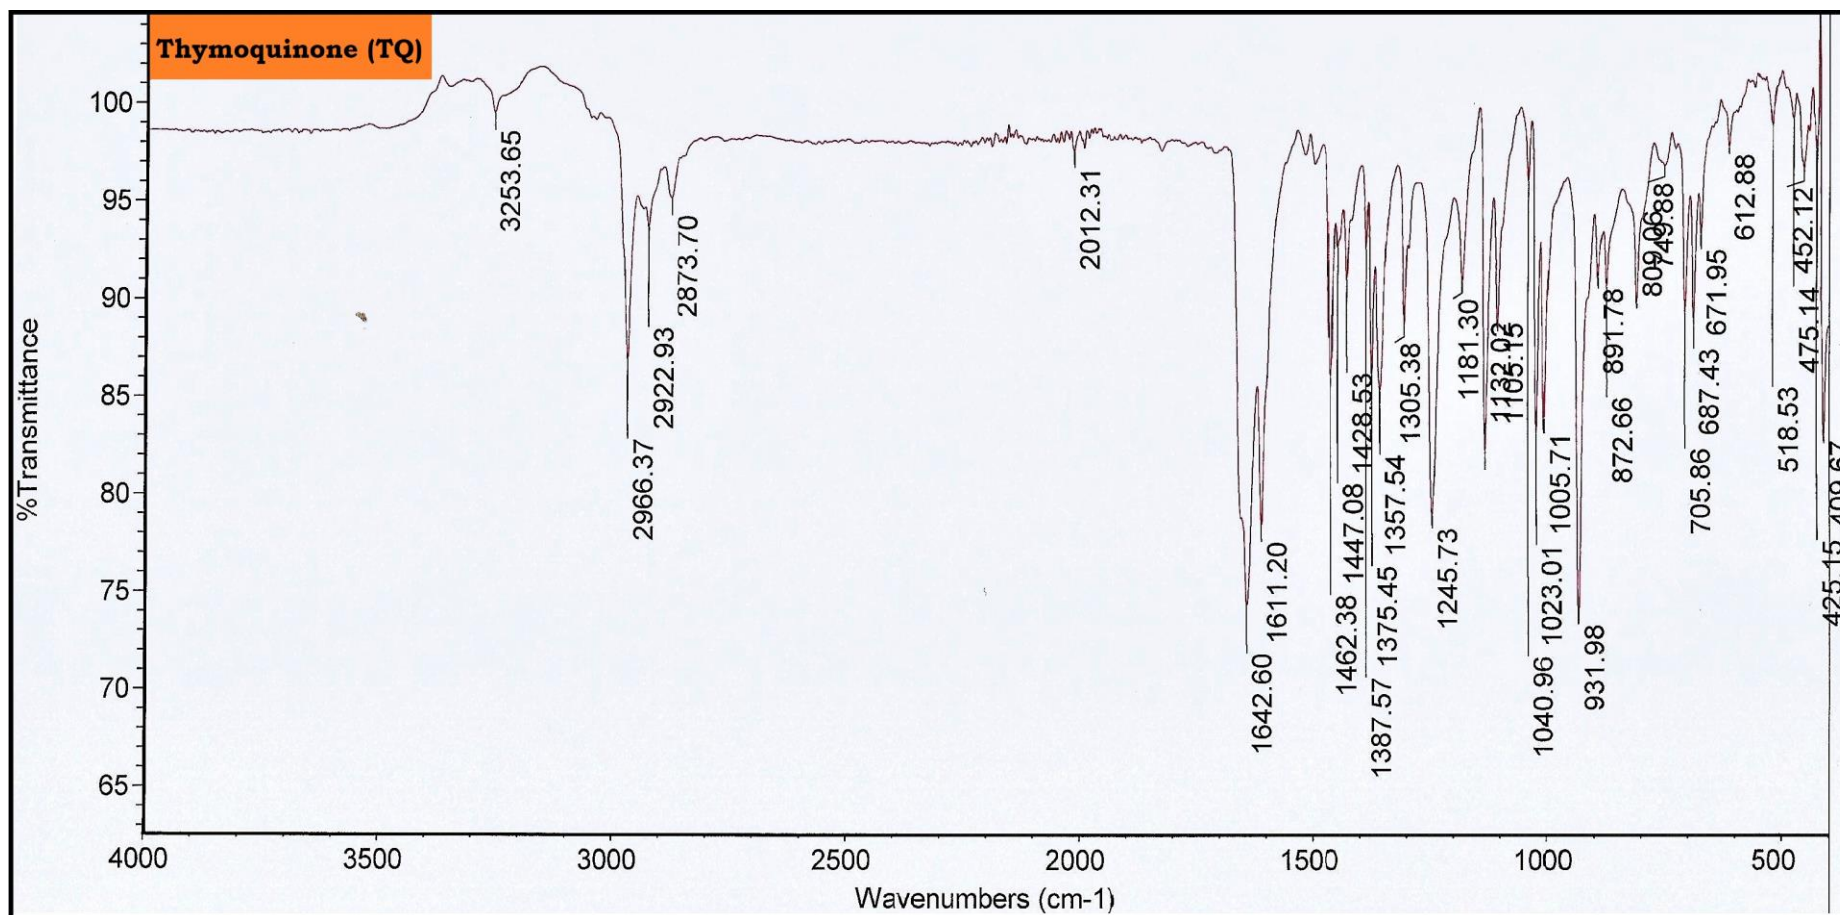

Figure S1. FT-IR spectra of thymoquinone (TQ).

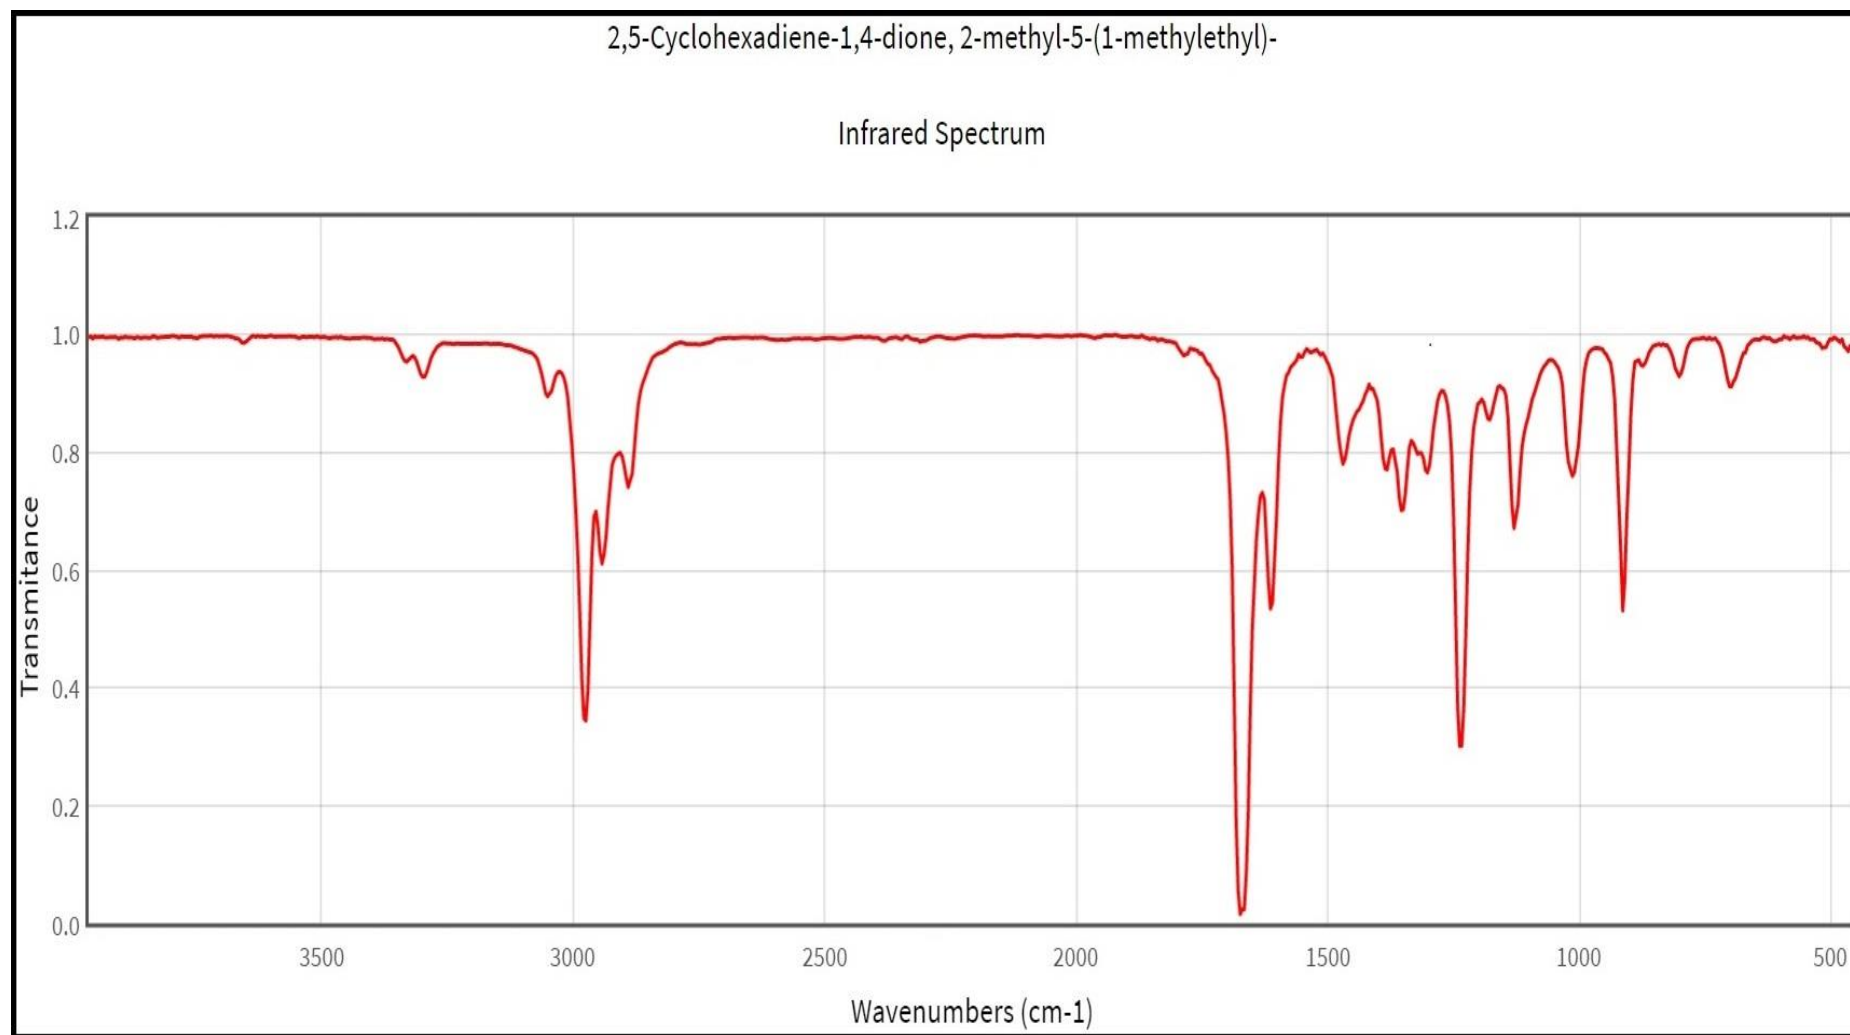

**Figure S2.** FT-IR spectra of standard TQ. (Source : <https://webbook.nist.gov/cgi/cbook.cgi?ID=C490915&Mask=80> )

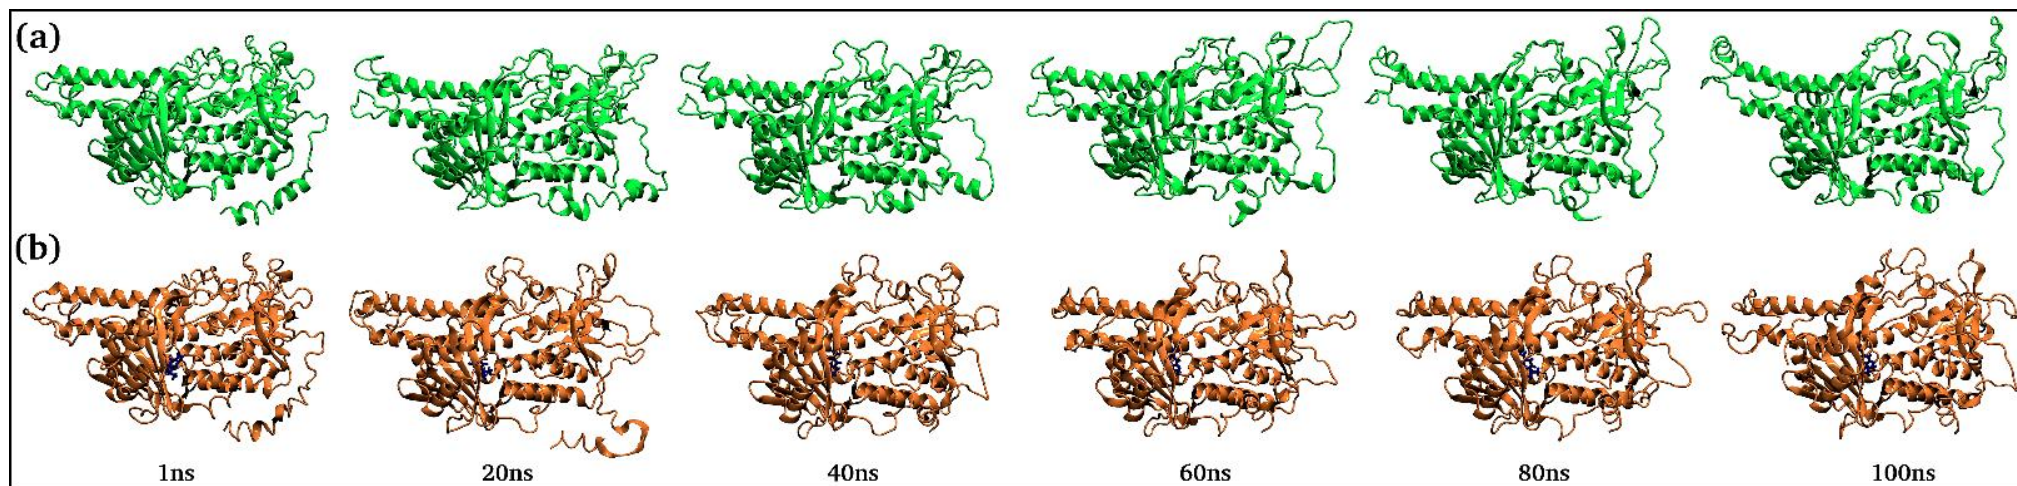

**Figure S3.** Snapshots of TQ-free (green) and bound states (orange) squalene monooxygenase protein at six different timescales, i.e., 1 ns, 20 ns, 40ns, 60 ns, 80 ns and 100 ns, during MD simulation study, indicating various conformational changes in the protein. As indicated, TQ remains in bound form throughout the simulation.

**Table S1.** The selected proteins for molecular docking studies with TQ ligand targeting multiple pathways in *Leishmania* spp. The table also lists the name of enzymes, their FASTA sequences, amino acid lengths, their PDB codes (if existed) or models (generated from homology modeling approach or threading approach), and the corresponding pathways where the protein is involved.

| #  | Enzyme                  | Organism           | FASTA                                                                                                                                                                                                                                                                                                                                                                                                                                                                                                                                                                                                                  | Amino acid | PDB/Model | Pathway               |
|----|-------------------------|--------------------|------------------------------------------------------------------------------------------------------------------------------------------------------------------------------------------------------------------------------------------------------------------------------------------------------------------------------------------------------------------------------------------------------------------------------------------------------------------------------------------------------------------------------------------------------------------------------------------------------------------------|------------|-----------|-----------------------|
| 1. | Trypanothione reductase | <i>L. infantum</i> | MGSSHHHHHHSSGLVPRGSHMS<br>RAYDLVVLGAGSGGLEAGWNA<br>AVTHKKKVAVVDVQATHGPPLF<br>AALGGTCVNVGCVPKKLMVTGA<br>QYMDLIRESGGFGWEMDRESLCP<br>NWKTLIAAKNKVVNSINESYKSM<br>FADTEGLSFHMGFGALQDAHTV<br>VVRKSEDPHSDVLETLDTEYILIAT<br>GSWPTRLGVPGDEFCSNEAFYL<br>EDAPKRMLCVGGGYIAVEFAGIF<br>NGYKPCGGYVDLCYRGDLILRGF<br>DTEVRKSLTKQLGANGIRVRTNL<br>NPTKITKNEDGSNHVHFNDGTEE<br>DYDQVMLAIGRVPRSQUALQLDK<br>AGVRTGKNQAVQVDAYSKTSVD<br>NIYAIGDVTNRVMLTPVAINEGA<br>AFVETVFGGKPRATDHTKVACA<br>VFSIPPIGTCGMTEEEAAKNYETV<br>AVYASSFTPLMHNISGSKHKEFMI<br>RIITNESNGEVLGVHMLGDSAPEI<br>IQSVGICMKMGAKISDFHSTIGVH<br>PTSAEELCSMRTPAYFYESGKRVE<br>KLSSNL | 511        | 2JK6      | Trypanothione pathway |

|    |                                      |                        |                                                                                                                                                                                                                                                                                                                                                                                                                                                                                                                         |     |                                                                                                     |                                                      |
|----|--------------------------------------|------------------------|-------------------------------------------------------------------------------------------------------------------------------------------------------------------------------------------------------------------------------------------------------------------------------------------------------------------------------------------------------------------------------------------------------------------------------------------------------------------------------------------------------------------------|-----|-----------------------------------------------------------------------------------------------------|------------------------------------------------------|
| 2. | Mannosyltransferase (GPI-14)         | <i>L. braziliensis</i> | MRNKTWLDRQSIGTLLLYGGLAR<br>VLLIYAAFHDYYFRVKYTDIDY<br>MIVVDGARELLHGGTPFDRTTYR<br>YTPLLAVLVIPAVLIANPLGKVVF<br>ALSDLGAAYYCFHMLLRFSTERS<br>AKWMVVILILFNPVVLNVSTRGN<br>SDMLISCMSMGVLAKFAEGRYFT<br>AASILGFAVHFKIYPIIYALPLVLG<br>VWERAKQERFFGRLAHTASVVV<br>GCGLCFTVAFAVPTYVCYLVYGQ<br>QYLDEGFIYHIIHREDHRHNFSPY<br>WLLMYLNMGRRDLGVGVDYSA<br>GLFAFLPQFAVLCYASWKLKNI<br>AHACCVETILFVAFNKVCTVQYF<br>VWFLPFLAFVFCEPAQPKWLTGV<br>TNAPKSERPSMLSAVAAILMWSL<br>MIPLWVWTAYGLEFEGRNHYGR<br>LWIVSCVFYLATVSLAAWLGRLC<br>YRSRITVSIKDHRPASKRA | 432 | I-Tasser<br>(Various<br>templates<br>were used<br>including:<br>5ezm.pdb,<br>5f15.pdb,<br>6snh.pdb) | Glycosylphosphatidylinosi<br>tol-anchor biosynthesis |
| 3. | Trypanothione synthetase-<br>amidase | <i>L. major</i>        | MSSLQRASVSFNKPGHIPFGAVQ<br>GYAPGGVPAYSNNKHDHYFSGER<br>NIEDNIFFGFKYQCVEFARRWLLV<br>RKGLLLPDVNWACHIFQLKEVR<br>DAATTESFAVLQVRNGTTTKPEA<br>DALLVYPSTDANPVGHVGTITEV<br>GDDYVCVADQNYRFHKWESSCA<br>YKLKLDHRDGIWTIIDDIDADEIEI<br>PLGWLTFFGRANRPEGAPPVALH                                                                                                                                                                                                                                                                        | 652 | 2VOB                                                                                                | Trypanothione pathway                                |

|    |                         |                 |                                                                                                                                                                                                                                                                                                                                                                                                                                                                                                                                         |     |             |                       |
|----|-------------------------|-----------------|-----------------------------------------------------------------------------------------------------------------------------------------------------------------------------------------------------------------------------------------------------------------------------------------------------------------------------------------------------------------------------------------------------------------------------------------------------------------------------------------------------------------------------------------|-----|-------------|-----------------------|
|    |                         |                 | PSLHFKEPPKPYLLRRNFLPTESK<br>ANWLDMNNPAERLFVEEFGMD<br>VSRTRLEEKVVSYYESNHEFHLRC<br>VAYGTQLHAIFMEATAQVIESDE<br>KLRLFAIPEEFWPRIRHSWKYQQT<br>YISGRFDFAFNNETGEVKCFEYN<br>ADSASTLLECGLIQKWAESVGL<br>DKQDTRGSGFAVERNLMAWA<br>NSGATGRVHFCVDEEREEQYTAL<br>YCMQAAEAVGLEGKLCILFDEFR<br>FDDNGHVVDSDGVRVRNVWKT<br>WMWESAITDYAAAREERGENWK<br>PSPKDKVRLCDLLLGDDWEILYFE<br>PMWKVIPSNKAILPMIYHNHPEH<br>PAILKAEYELTDELRKHGYAKKPI<br>VGRVGSNVIITSGDGVVHAESGG<br>KYGKRNMIIYQQLFELKKQDDYY<br>AIIGGWMIGDAFSGTGIREDKSVI<br>TGVDSPFAAVRIKTDKLPHVTLK<br>DIDKMAEDE |     |             |                       |
| 4. | Tryparedoxin peroxidase | <i>L. major</i> | MSCGNAKINSPAPSFEVALMPN<br>GSFKKISLSSYKGKWVVLFFYPLD<br>FTFVCPTEVIAFSDSVSRFNELNCE<br>VLACSIDSEY AHLQWTLQDRKKG<br>GLGTMAIPMLADKTKSIARSYGV<br>LEESQGVAYRGLFIIDPHGMLRQI<br>TVNDMPVGRSVEEVLRLLEAFQF                                                                                                                                                                                                                                                                                                                                           | 199 | <b>4K1F</b> | Trypanothione pathway |

|    |                          |                 |                                                                                                                                                                                                                                                                                                                                                                                                                                                                                             |     |                                                                                                                             |                             |
|----|--------------------------|-----------------|---------------------------------------------------------------------------------------------------------------------------------------------------------------------------------------------------------------------------------------------------------------------------------------------------------------------------------------------------------------------------------------------------------------------------------------------------------------------------------------------|-----|-----------------------------------------------------------------------------------------------------------------------------|-----------------------------|
|    |                          |                 | VEKHGEVCPANWKKGAPTMKPE<br>PNASVEGYFSKQ                                                                                                                                                                                                                                                                                                                                                                                                                                                      |     |                                                                                                                             |                             |
| 5. | <u>Squalene synthase</u> | <i>L. major</i> | MGFFSDSVAMMRVKWQMRSVKI<br>QVPPEETDLRFCYDIMNDVSRFA<br>VVVAQLADQQLRDAICIFYLVLR<br>ALDTLEDDMSVPVDVKLKELPKF<br>HTHTSDMSWCMMSGVGEGREREL<br>LAKYPCVSREFKKLKKEYQDVIA<br>NICERMANGMCEFLKRPVVTGD<br>DYNQYCHYVAGLVGHGLTQLFA<br>RCGFEDPSLDDDLTSSNHMGLFL<br>QKTNIIRDYEDIREPPRMFWPK<br>EIWGTYYTELKELKSESNNAAAV<br>QCLNAMVADALVHVPYIVDYL<br>ALRDPVFRFCAIPQVMAIATLKE<br>VYNNPDTFQVKVKSREPESCRIM<br>LKATTLYSSLSMFRDYCVLQEK<br>DMQDASSVSIANSIAAIAERIDLQ<br>LKKCQDVSYTRSLARYPGLGGQ<br>FLLTVMDTVAGFFGGRKEIAGHA | 414 | Swiss Model<br>( <b>Template used:</b><br>3wca.pdb<br><b>Query Coverage:</b><br>82%<br><b>Sequence Identity:</b><br>61.83%) | Sterol biosynthetic pathway |
| 6. | Squalene monooxygenase   | <i>L. major</i> | MLYFFAAVLCAVSTLLLLNRTLRS<br>LRLSPARTSYDYDVIIVGGSIAGPV<br>LAKALSDQGRKVLMMVERTLFTKP<br>DRIVGELLQPGGLNALKEVGMKE<br>CAETIGMPCHGYVVVDHKGKQV<br>DLPYRKGASGVSFHFGDFVQSLRS<br>HVFHNCKANVTMVEGTVNNILT<br>EGLSFSERAYGVEYTIAEKYEVPT                                                                                                                                                                                                                                                                    | 569 | I-Tasser<br>(Various templates were used including:<br>6c6n.pdb,<br>6fho.pdb,<br>6c6r.pdb)                                  | Sterol biosynthetic pathway |



|    |                                 |                 |                                                                                                                                                                                                                                                                                                                                                                                                                                                                |     |      |                             |
|----|---------------------------------|-----------------|----------------------------------------------------------------------------------------------------------------------------------------------------------------------------------------------------------------------------------------------------------------------------------------------------------------------------------------------------------------------------------------------------------------------------------------------------------------|-----|------|-----------------------------|
|    |                                 |                 | KPFREDPPKTNPVAATVRKVATA<br>PLVVMCDGGMSKWKSRYQHYTP<br>AYEYHSHFIGLVLKTVRLPKEQRG<br>TVFFGKTGPILSYRLDDNELRLLV<br>DYNKPTLPSLEKQSEWLIQDVAP<br>CLPENMREQFVRVSKDTKSLRSM<br>PMARYPPAFPSIKGYVGIGDHAN<br>QRHPLTGGGMTCCFRDAIRLANS<br>LNGIQSLRSVNQEEMAAIEDKIQ<br>AAILNYARYRYTHSCCINLLSWA<br>LYSVFSSPALRDACFDYFLCGGNC<br>VTGPMDLLAGLDPNVGSLFFHYC<br>CVMLHGVANVMMRTGAYSESG<br>KQLSNLEKLTNVASFFVDWERM<br>KHAAYLLGKSTQIALPLAKSEFYS<br>MWRFVDPTSPLANISKRIKTMVY<br>TKQFNGKQRKPVGL |     |      |                             |
| 7. | Farnesyl pyrophosphate synthase | <i>L. major</i> | MAHMERFQKVYEEVQEFLLGDA<br>EKRFEMDVHRKGYLKSMMDTTC<br>LGGKYNRGLCVVDVAEAMAKD<br>TQMDAAAMERVLHDACVCGW<br>MIEMPLQAHFLVEDDIMDHSKTRR<br>GKPCWYLHPGVTAQVAINDGLIL<br>LAWATQMALHYFADRPFLAEVL<br>RVFHDVDLTTTIGQLYDVTSMD<br>SAKLDKVAHANTTDYVEYTPF<br>NHRRIVVYKTAYYTYWLPLVMG<br>LLVSGTLEKVDKKATHKVAMVM                                                                                                                                                                      | 362 | 4JZX | Sterol biosynthetic pathway |

|    |                                             |                 |                                                                                                                                                                                                                                                                                                                                                                                                                                    |     |                                                                                                                                         |                    |
|----|---------------------------------------------|-----------------|------------------------------------------------------------------------------------------------------------------------------------------------------------------------------------------------------------------------------------------------------------------------------------------------------------------------------------------------------------------------------------------------------------------------------------|-----|-----------------------------------------------------------------------------------------------------------------------------------------|--------------------|
|    |                                             |                 | GEYFQVQDDVMDCTPPEKLGKI<br>GTDIEDAKCSWLAVTFLTTAPAE<br>KVAEFKANYGSTDPAAVAVIKQL<br>YTEQNLLARFEEYEKAVVAEVEQ<br>LIAALEAQNAFAASVKVLWSKT<br>YKRQK                                                                                                                                                                                                                                                                                         |     |                                                                                                                                         |                    |
| 8. | Glyceraldehyde-3-phosphate<br>dehydrogenase | <i>L. major</i> | MAPIKVGINGFGRIGRMVLQAIC<br>DQGLIGNEIDVVAVVDMSTNAEY<br>FAYQMKYDTVHGRPKYTVEAVK<br>STPSVKTPDVLVVNGHRIKCVKA<br>QRNPADLPWGKLGVDYVIESTGL<br>FTDKLQAEGLHGGAKKVVISAP<br>ASGGAKTIVMGVNQHEYSPTSH<br>HVVSNASCTTNCLAPIVHVLTK<br>NFGIETGLMTTIHSYTATQKTVDG<br>VSLKDWRGGRAAAINIIPSTTGA<br>AKAVGMVIPSTKGKLTGMSFRVP<br>TPDVSVDLTFRSTRETSIQEIDKA<br>IKKAAQTYMKDILGFTNDELVSS<br>DFINDNRSSVYDSKATLQNNLPG<br>EKRFFKIVSWYDNEWGYSHRVVD<br>LVRYMAATDAASAKM | 361 | Swiss Model<br>( <b>Template<br/>used:</b><br>1gyq.pdb<br><b>Query<br/>Coverage:</b><br>99%<br><b>Sequence<br/>Identity:</b><br>94.69%) | Glycolytic pathway |
| 9. | Triosephosphate isomerase                   | <i>L. major</i> | MSAKPQPIAAANWKCNGTTASIE<br>KLVQVLNEHNISHDVQCVPVPTF<br>VHIPLVQAKLRNPKYVVSANAI<br>AKSGAFTGEVSMPILKDLGINWVI<br>LGHSEERTYYGETDETVAQKVAD<br>ACKQGFMVIACIGETLQQREANQ                                                                                                                                                                                                                                                                     | 251 | Swiss Model<br>( <b>Template<br/>used:</b><br>5cg7.pdb                                                                                  | Glycolytic pathway |

|     |                         |                 |                                                                                                                                                                                                                                                                                                                                                                                                                                                                                                                                                                              |     |                                                                                                                                                           |                    |
|-----|-------------------------|-----------------|------------------------------------------------------------------------------------------------------------------------------------------------------------------------------------------------------------------------------------------------------------------------------------------------------------------------------------------------------------------------------------------------------------------------------------------------------------------------------------------------------------------------------------------------------------------------------|-----|-----------------------------------------------------------------------------------------------------------------------------------------------------------|--------------------|
|     |                         |                 | TAKVVLSTSAIATKLPKEAWDQ<br>IVLAYEPVWAIGTGKVATPEQAQ<br>EVHALLRKWVSEKIGTDVAAKLR<br>ILYGGSVSAGNAKTLYMKPDING<br>FLVGGASLKPEFRDIIDATR                                                                                                                                                                                                                                                                                                                                                                                                                                              |     | <b>Query</b><br><b>Coverage:</b><br>100%<br><b>Sequence</b><br><b>Identity:</b><br>91.63%)                                                                |                    |
| 10. | Phosphoglycerate kinase | <i>L. major</i> | MSLVLKKSIDDATVRDKKVLIRV<br>DFNVPVKNGKITNDFRIRSALPTI<br>QKVLKEGGSCILMSHLGRPKGAR<br>MSDPSPEKGVRYEAAATLRPVA<br>ARIAELLGQKVEFAPDCLDAAAY<br>ASKLKNQDVLLLENVRFYAEEGS<br>KKEEERDAMAKVLASYADLYVS<br>DAFGTAHRDSATMTGIPKVLGA<br>GYAGYLMEKEINYFSRVLNNPPR<br>PLVAIVGGAKVSDKIELLDNMLS<br>RINYLVIGGAMAYTFQKAQGRKI<br>GISMCEEDKLDLAKSLLKKAQER<br>GVQVFLPVDHVCNKEFKAADSP<br>LVTESVDVPDGYMALDIGPRTIH<br>MYEEVIGRCKSAIWNGPMGVFE<br>MPCYSKGTFAVAKAMGTGTQKN<br>GLLSIIGGDSASAAELSGEAKN<br>MSHVSTGGGASLELLEGTLPGV<br>AILTDKDVKERGASCRFAFGVGS<br>PSREACPLRCGHIFGGASIVREIVK<br>LVVALLIGIFIGRRMSTKLIR | 479 | Swiss Model<br>( <b>Template</b><br><b>used:</b><br>16pk.pdb<br><b>Query</b><br><b>Coverage:</b><br>86%<br><b>Sequence</b><br><b>Identity:</b><br>73.39%) | Glycolytic pathway |

|     |                                                                      |                 |                                                                                                                                                                                                                                                                                                                                                                                                                                                                                                                                                                                                           |     |                                                                                                                                          |                    |
|-----|----------------------------------------------------------------------|-----------------|-----------------------------------------------------------------------------------------------------------------------------------------------------------------------------------------------------------------------------------------------------------------------------------------------------------------------------------------------------------------------------------------------------------------------------------------------------------------------------------------------------------------------------------------------------------------------------------------------------------|-----|------------------------------------------------------------------------------------------------------------------------------------------|--------------------|
| 11. | Pyruvate kinase                                                      | <i>L. major</i> | MSQLAHNLTLSIFEPVANHRATRI<br>VCTIGPSTQSVEALKGLIQSGMSV<br>ARMNFSHGSHEYHQTTINNVRQ<br>AAAELGVNIAIALDTKGPEIRTGQ<br>FVGGEAVMERGATCYVTTDPAF<br>ADKGTKDKFYIDYQNLSKVVRPG<br>SYIYIDDGILILHVQSHEDQTLKC<br>TVTNAHTISDRRGVNLPGCDVDL<br>PAVSAKDCADLQFGVEQGVDMI<br>FASFIRSAEQVG DVRKALGAKGH<br>DIMIICKIENHQGVQNIDSIIIESD<br>GIMVARGDLGVEIPA EKVVVAQK<br>ILISKCNVAGKPVICATQMLESMT<br>YNPRPTRA EVSDVANAVFNGAD<br>CVMLSGETAKGKYPNEVVQYMA<br>RICLEAQSAVNEYVFFNSIKKLQPI<br>PMSAEEAVCSSAVNSVYETKAKV<br>MVVLSNTGRSARLVAKYRPNCPI<br>VCVTTRLQTCRQLNITQGVESVFF<br>DAEKLGHDEGKEQRVAMGVGF<br>AKSKGYVQTGDYSVVIHADHKV<br>KGYANQTRILLVE | 499 | Swiss Model<br>( <b>Template<br/>used:</b><br>3hqn.pdb<br><b>Query<br/>Coverage:</b><br>100%<br><b>Sequence<br/>Identity:</b><br>95.59%) | Glycolytic pathway |
| 12. | Phosphoglycerate mutase (2,3-<br>diphosphoglycerate-<br>independent) | <i>L. major</i> | MSNLLLRPHKDLPRRKLIVVMD<br>GLGIGPEDEYDAVHMASTPFMD<br>AQRQNSRHFRSVRAHGTAVGLP<br>TDADMGNSEVGHNALGAGRVA<br>LQGASLVDDALKSGEIYTGEgyr<br>YLLGAFTKEGSTLHLIGLLSDGGV                                                                                                                                                                                                                                                                                                                                                                                                                                                | 553 | Swiss Model<br>( <b>Template<br/>used:</b><br>3igy.pdb                                                                                   | Glycolytic pathway |

|     |                                   |                 |                                                                                                                                                                                                                                                                                                                                                                                                                                                                                                               |     |                                                                                                         |                    |
|-----|-----------------------------------|-----------------|---------------------------------------------------------------------------------------------------------------------------------------------------------------------------------------------------------------------------------------------------------------------------------------------------------------------------------------------------------------------------------------------------------------------------------------------------------------------------------------------------------------|-----|---------------------------------------------------------------------------------------------------------|--------------------|
|     |                                   |                 | HSRDNQIHSIEHA AKNGAKGIR<br>VHVLYDGRDVPDGSSFRFTEELE<br>AVLARVRQDGCDAAIASGGGRM<br>FVTMDRYDADWSIVERGWKAQV<br>LGDARHFHSAKEAITTFREEDPK<br>VTDQYYPPFVVVDEQGKPLGTIE<br>DGDAVLCVNFRGDRVIEMTRAFE<br>DEDFDKFDRVRVPKVRVYAGMMR<br>YDGD LGIPNNFLVPPP KLTRVSEE<br>YLCGTGLQIFACSETQKFGHVTYF<br>WNGNRSGKVDEEHETFKEVPSD<br>RVHFNEQPKMKSAEITEAAIEAL<br>KSGMYDVVRINFPNGDMVGHTG<br>DLRATIAGVEAVDESLAKLKDAV<br>DSINGVFIVTADHGNSDDMAQR<br>DKKGKPMKDEKGNVLPLTSHTLS<br>PVPVFIGGAGLDPRVAMRTDLPT<br>AGLANVTATFINLLGFEAPEDYEP<br>SLIFVEN |     | <b>Query</b><br><b>Coverage:</b><br>100%<br><b>Sequence</b><br><b>Identity:</b><br>92.21%)              |                    |
| 13. | Fructose-bisphosphate<br>aldolase | <i>L. major</i> | MSRV TIFQSQLPACNRIKTPYESEL<br>IATVKKLTTPGKGLLADESIGSC<br>TKRFEPIGLSNTTEEHRRQYRALML<br>EAEGLEQYISGVILHDETVS QKAS<br>NGKTFPEYL TARGVVPGIKTD MG<br>LCPLLEGAEGEQMTEGLDGYVKR<br>ASVYYKKGCRFCKWRNVYKIQN<br>GTVSEPAVRFNAETLARYAILSQ<br>MSGLVPIVEPEVMIDGKHDIDTC                                                                                                                                                                                                                                                       | 371 | Swiss Model<br><b>(Template</b><br><b>used:</b><br>2qap.pdb<br><b>Query</b><br><b>Coverage:</b><br>100% | Glycolytic pathway |

|     |                                       |                 |                                                                                                                                                                                                                                                                                   |     |                                                                                                                                         |                        |
|-----|---------------------------------------|-----------------|-----------------------------------------------------------------------------------------------------------------------------------------------------------------------------------------------------------------------------------------------------------------------------------|-----|-----------------------------------------------------------------------------------------------------------------------------------------|------------------------|
|     |                                       |                 | QRVSEHVVWREVVAALQRHGVIV<br>EGCLLKPNMVVPGAESGQTAAP<br>EQVAHYTVMTLARTMPAMPLPGV<br>MFLSGGLSEVQASEYLNAINNSPL<br>PRPYFLSFSYARALQSSALKAWG<br>GKDSGVAAGRRAFLHRARMNS<br>MAQLGKYKRADDDASSSSLYVK<br>GNIY                                                                                    |     | <b>Sequence<br/>Identity:</b><br>95.96%)                                                                                                |                        |
| 14. | Adenine<br>phosphoribosyltransferase  | <i>L. major</i> | MSFKEISPNSFLLSDSHPLSQLLKK<br>NYCWYSPVFSPRNVPRFADVSSIT<br>ESPETLKAIRDFLVQRYRTMSPAP<br>THILGFDARGFLFGPMIAVELGIP<br>FVLMRKADKNAGLLIRSEPYEKE<br>YKEAAPEVMTIRYGSISKGSRVVLI<br>DDVLATGGTALSGLQLVEASDA<br>MVMEMVSILCIPFLKAAEKIHSTG<br>HSRYKDIKFISLLSEEALTEDNCG<br>DSKNYTGPRVVSCGDVLSKHSQ | 237 | Swiss Model<br>( <b>Template<br/>used:</b><br>1qb7.pdb<br><b>Query<br/>Coverage:</b><br>98%<br><b>Sequence<br/>Identity:</b><br>92.27%) | Purine salvage pathway |
| 15. | Xanthine<br>phosphoribosyltransferase | <i>L. major</i> | MLPNHSCCKGFVDAQGRVFDGR<br>EYPMASGIVATEDVIQANIKAMA<br>NTIAKDYKSLSHRDVRLSPGTAA<br>TAEAAEAPISYDNPLIISVLKGSYI<br>FTSDFIRYLGDCGLPHVVDVFLA<br>SYNSDTTSTGQISMLAGLRFENLR<br>GKHVLIVEDVCDSGRTLRLRDYI<br>MEKFQPKSVKTLVMVNKEQAAR<br>KLDFDPEYFCLAGPNKYIVGYGFE                                 | 238 | Swiss Model<br>( <b>Template<br/>used:</b><br>6mxc.pdb<br><b>Query<br/>Coverage:</b><br>92%<br><b>Sequence<br/>Identity:</b><br>56.36%) | Purine salvage pathway |

|     |                           |                 |                                                                                                                                                                                                                                                                                                                                                                                           |     |                                                                                        |                                  |
|-----|---------------------------|-----------------|-------------------------------------------------------------------------------------------------------------------------------------------------------------------------------------------------------------------------------------------------------------------------------------------------------------------------------------------------------------------------------------------|-----|----------------------------------------------------------------------------------------|----------------------------------|
|     |                           |                 | VNDRYRDLRHIFILRDGEATRYPA<br>KL                                                                                                                                                                                                                                                                                                                                                            |     |                                                                                        |                                  |
| 16. | Deoxyhypusine hydroxylase | <i>L. major</i> | MSASNSCTVEEVRKEYAKLLDPQ<br>EPLDSRMRELYRLKEDCLKTVAG<br>VTVILEAIDTTDSVLLQHELAYNA<br>GQSGREEAVPELERILRTTSYDVV<br>TRHEAAEALGAIGSPLALQVLET<br>HSAPTTEPEASIRETCELALARIA<br>MKETKGDAAVAPPSGCEFVSVDP<br>SPAFSALYSSTDEPVPLTVEELEAV<br>LLDTSGRTRLFRRYMAMFTLRNL<br>ATEAAVAALCRGLREDTISALFR<br>HEVAFVLGQLERPSSQPALIAALK<br>DEEEAPMVRHEAAEALGAIADP<br>ATLPVLESYATHHEPIVRDSCVVA<br>LEMHKYWAHFNSLAHQQQEA | 325 | I-Tasser<br>(Various<br>templates<br>were used<br>including:<br>4d4z.pdb,<br>6fsq.pdb) | Hypusine biosynthetic<br>pathway |
